# Supplementary material
Source: PubMed Central journal article supplement (PMC6941750)
Supplement: NIHMS1539611-supplement-2.pdf [file NIHMS1539611-supplement-2.pdf]

A. Protein Interaction with molecules identified in HNSCC TCGA

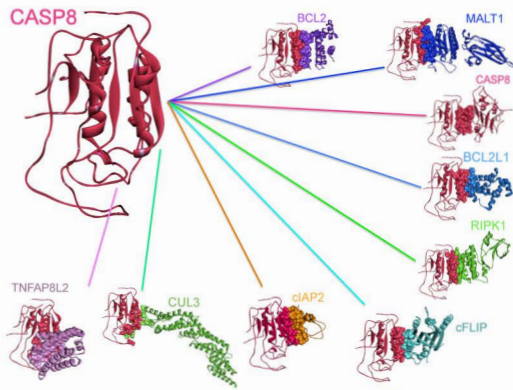

B. Previous knowledge of NF- $\kappa$ B and TNF pathways

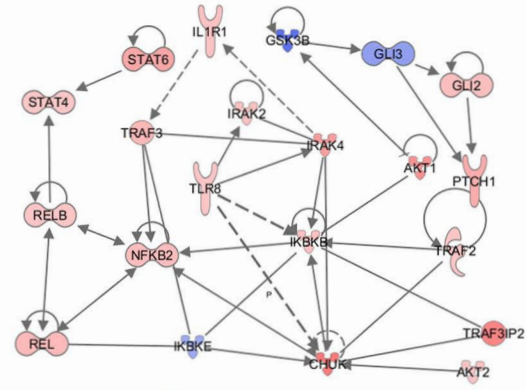

C. Generated gene list

61 gene list

D. Searched through data sets

HNSCC TCGA

E. Compared between cancer types

Pan TCGA

F. Experimental data

Cross validation

RNA-seq

Microarray

Gene BLAzer

Function assay

## A Lung Squamous Cell Carcinoma

All tumor samples that have mRNA, CNA and sequencing data (178 samples)

Altered in 151 (85%) of cases

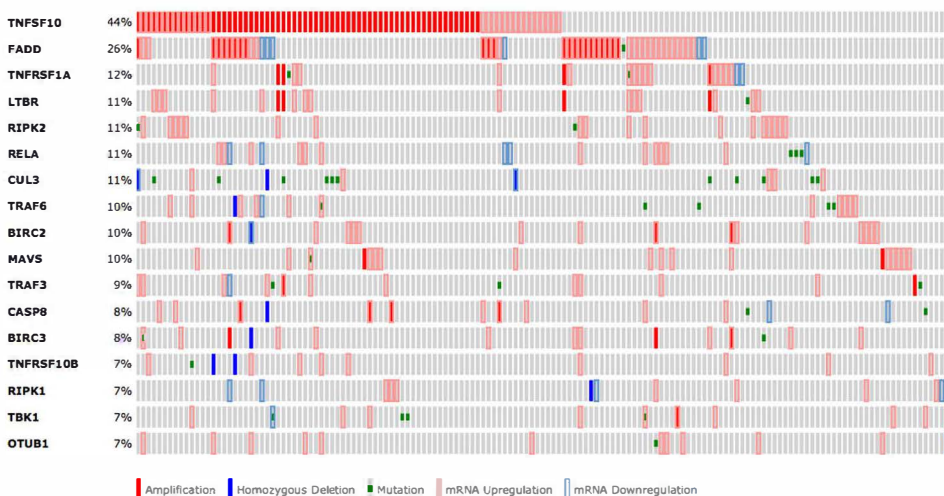

## B Bladder Squamous Cell Carcinoma

All tumor samples (131 samples)

Altered in 103 (79%) of cases

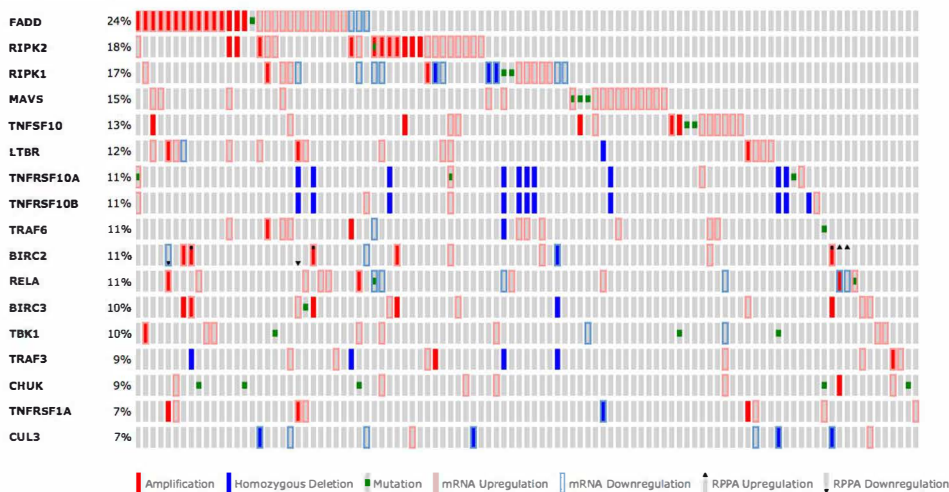

## C Ovarian Cancer

All tumor samples that have mRNA, CNA and sequencing data (316 samples)

Altered in 289 (91%) of cases

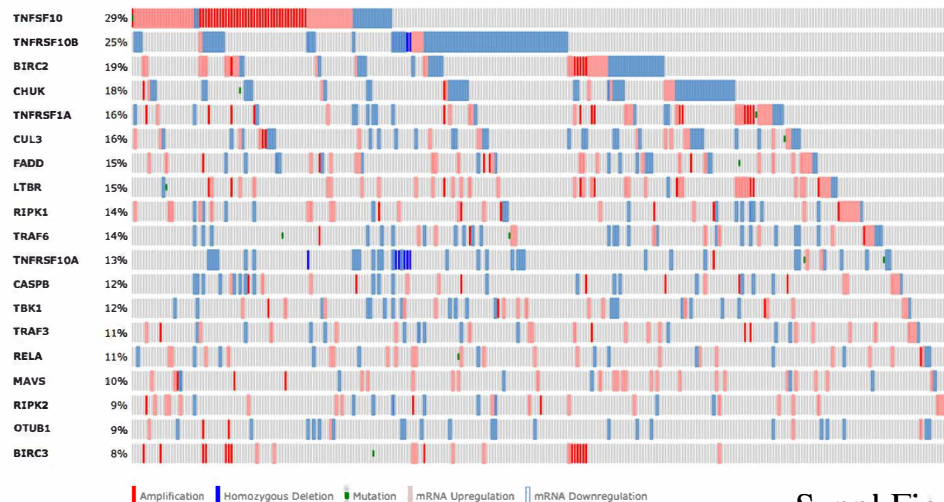

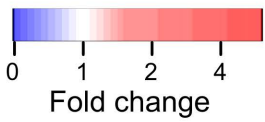

■ Keratinocyte lines

■ HPV(-) cell lines

■ HPV(+) cell lines

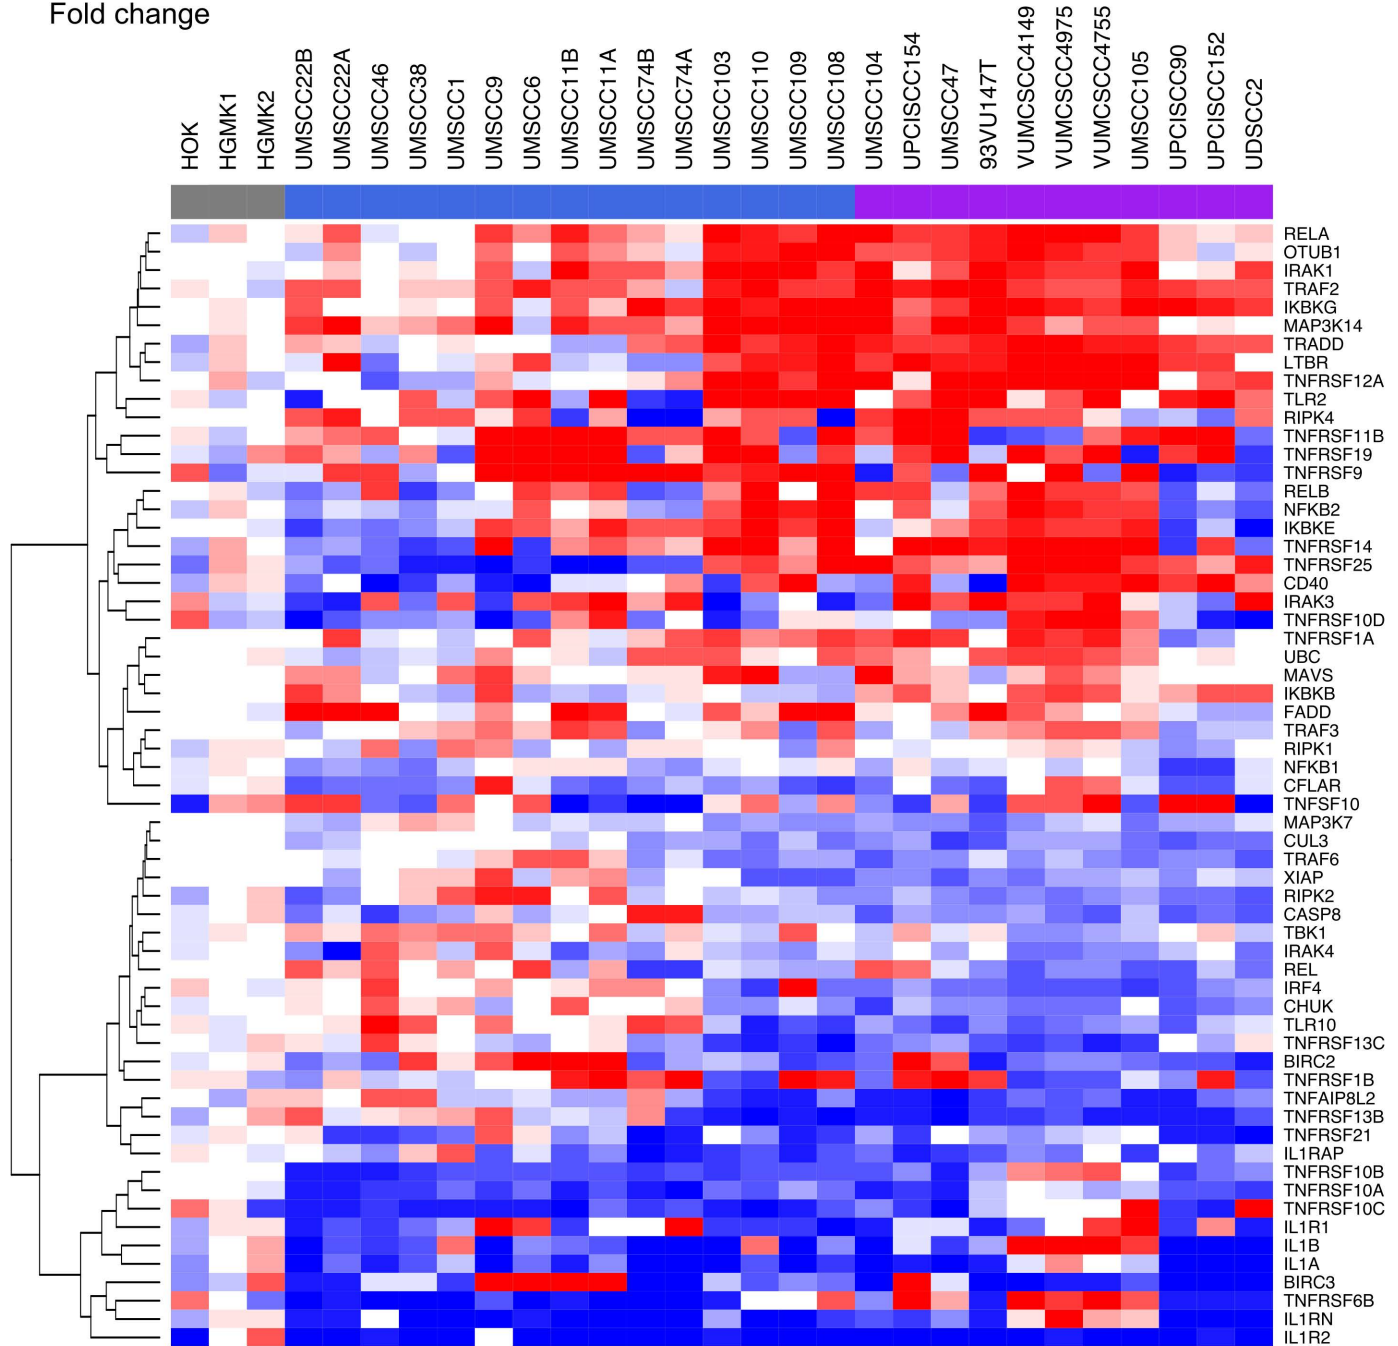

Suppl Fig 3

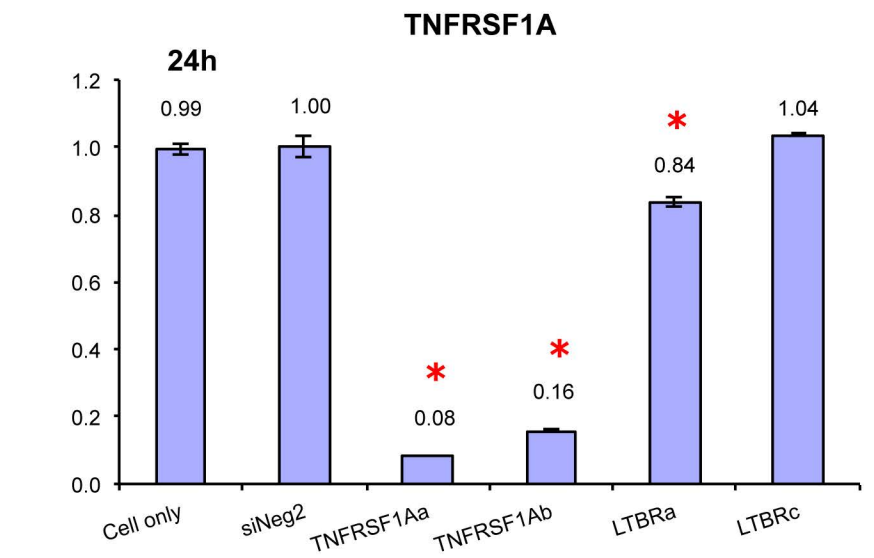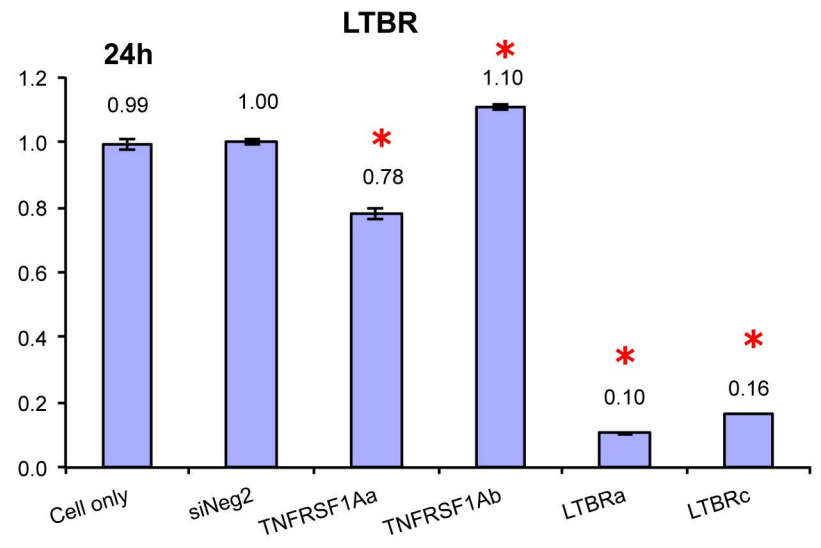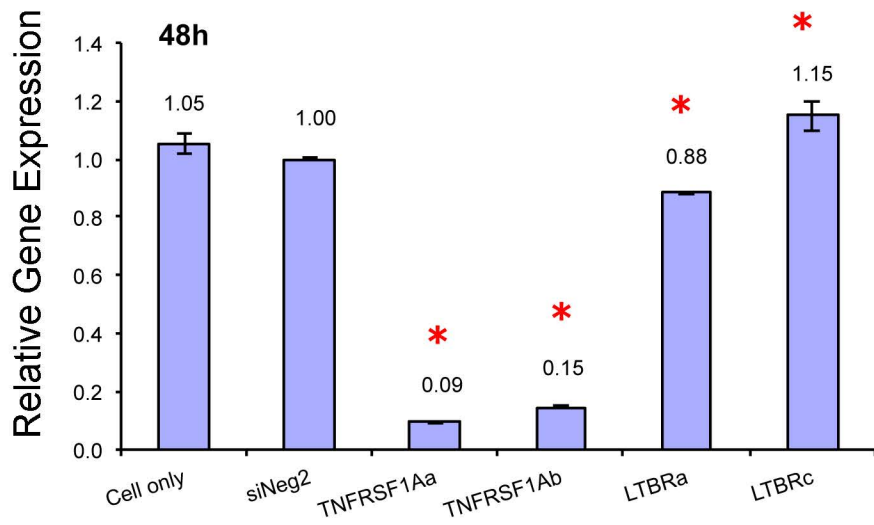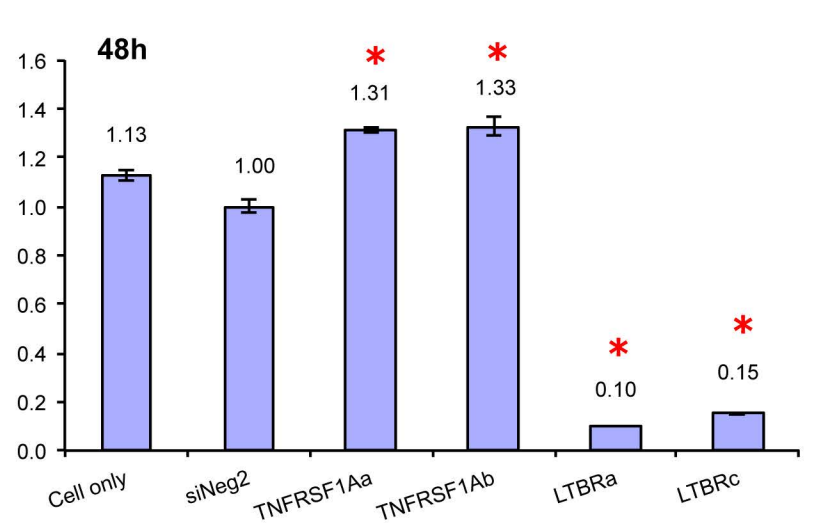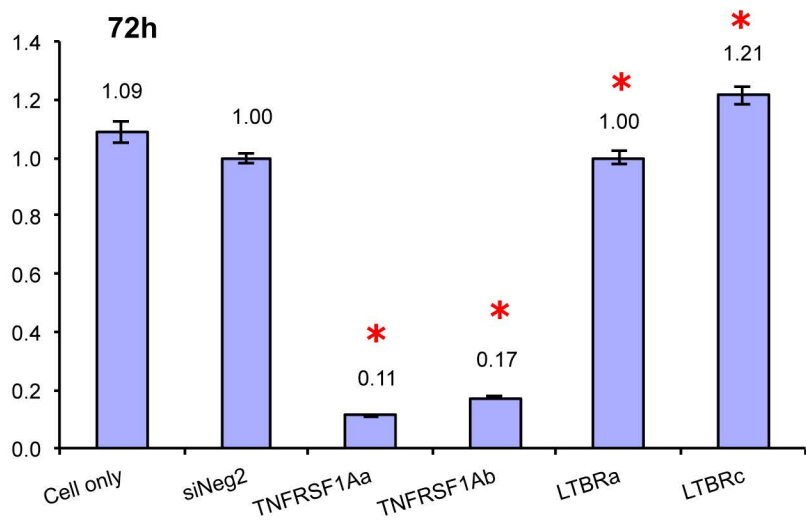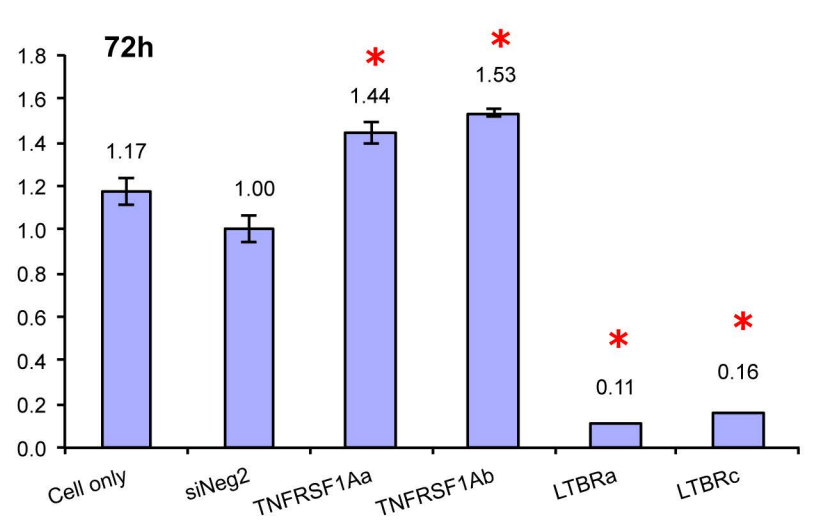

siRNA

Suppl Fig 4

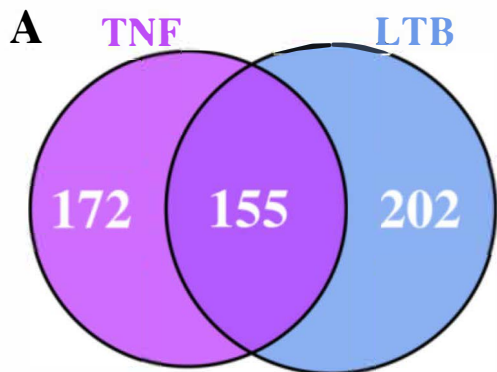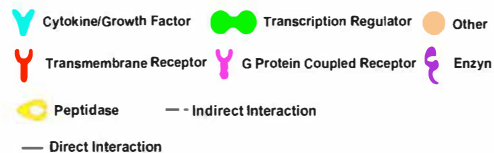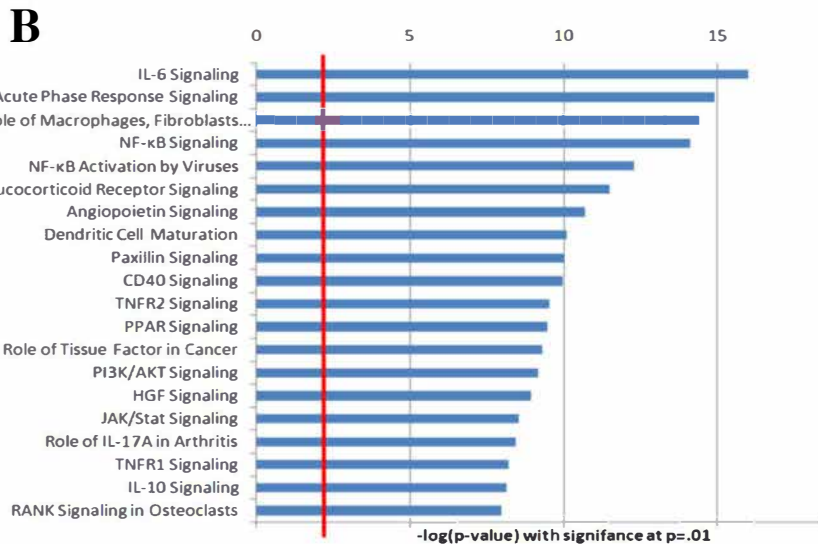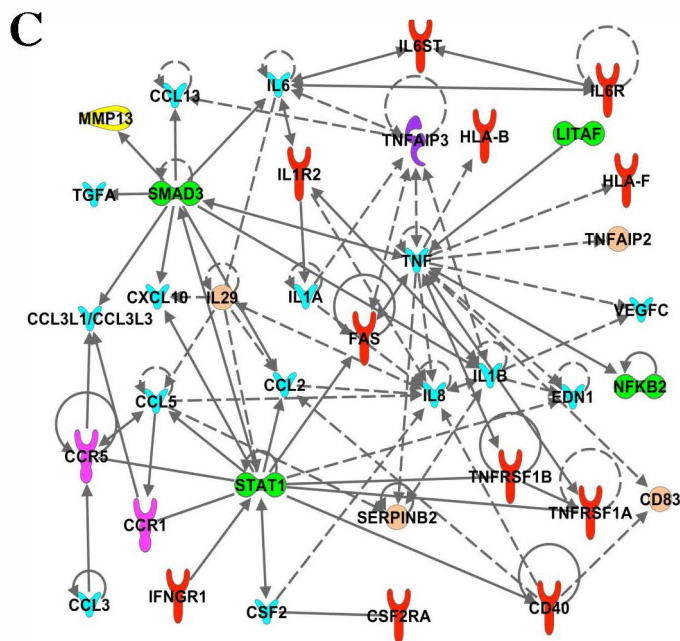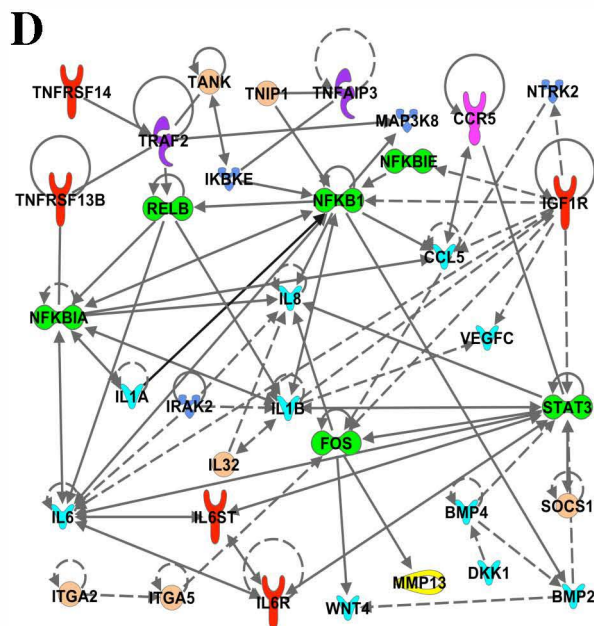

Relative Gene Expression

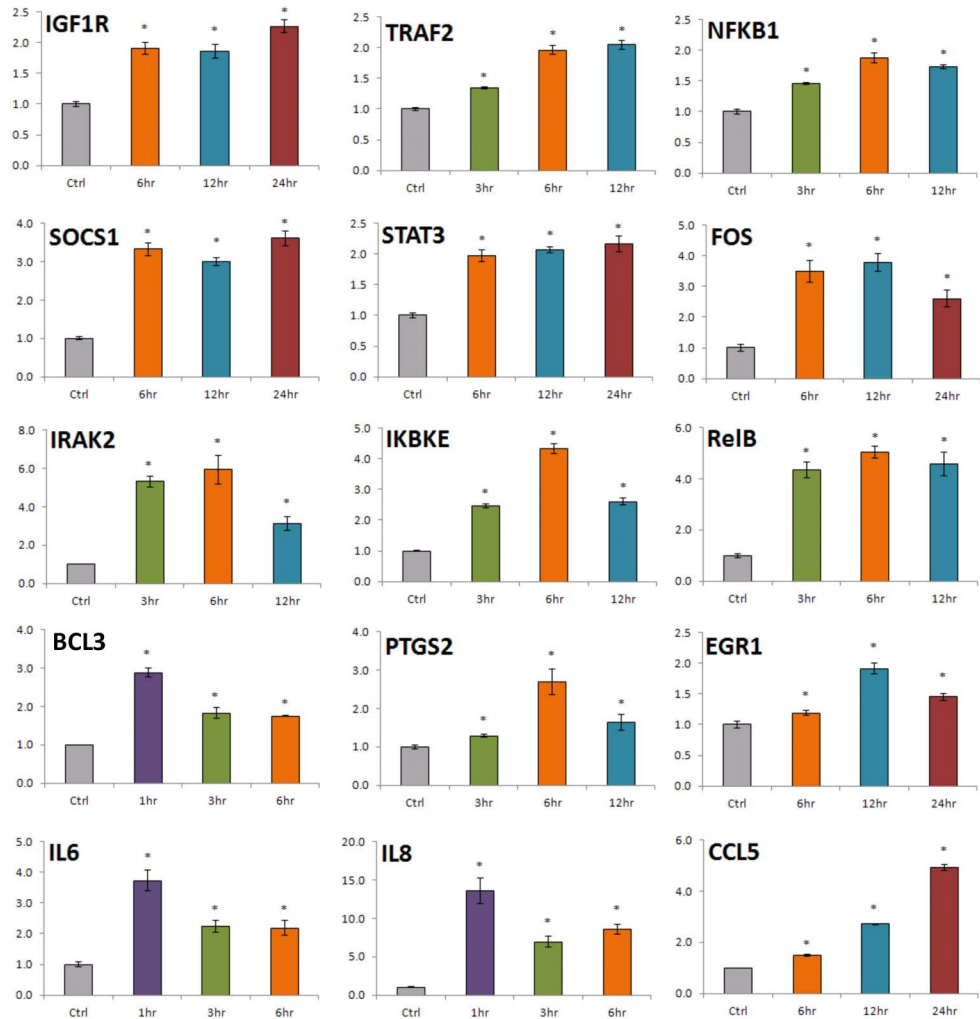

Hours

Suppl Fig 6

**Relative gene expression**

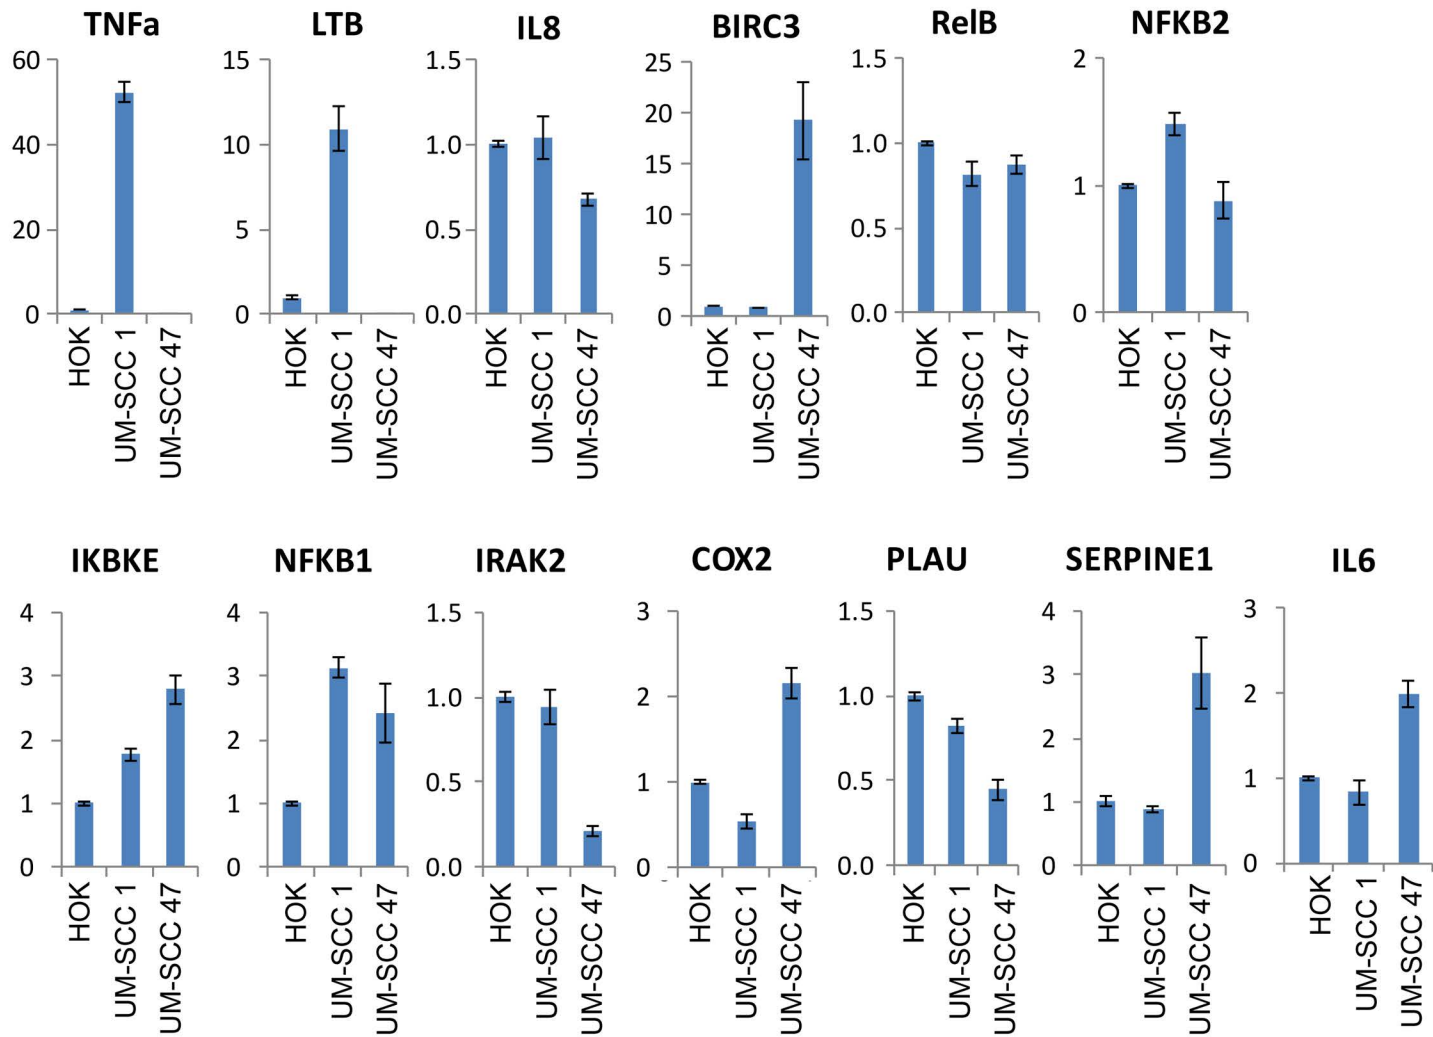

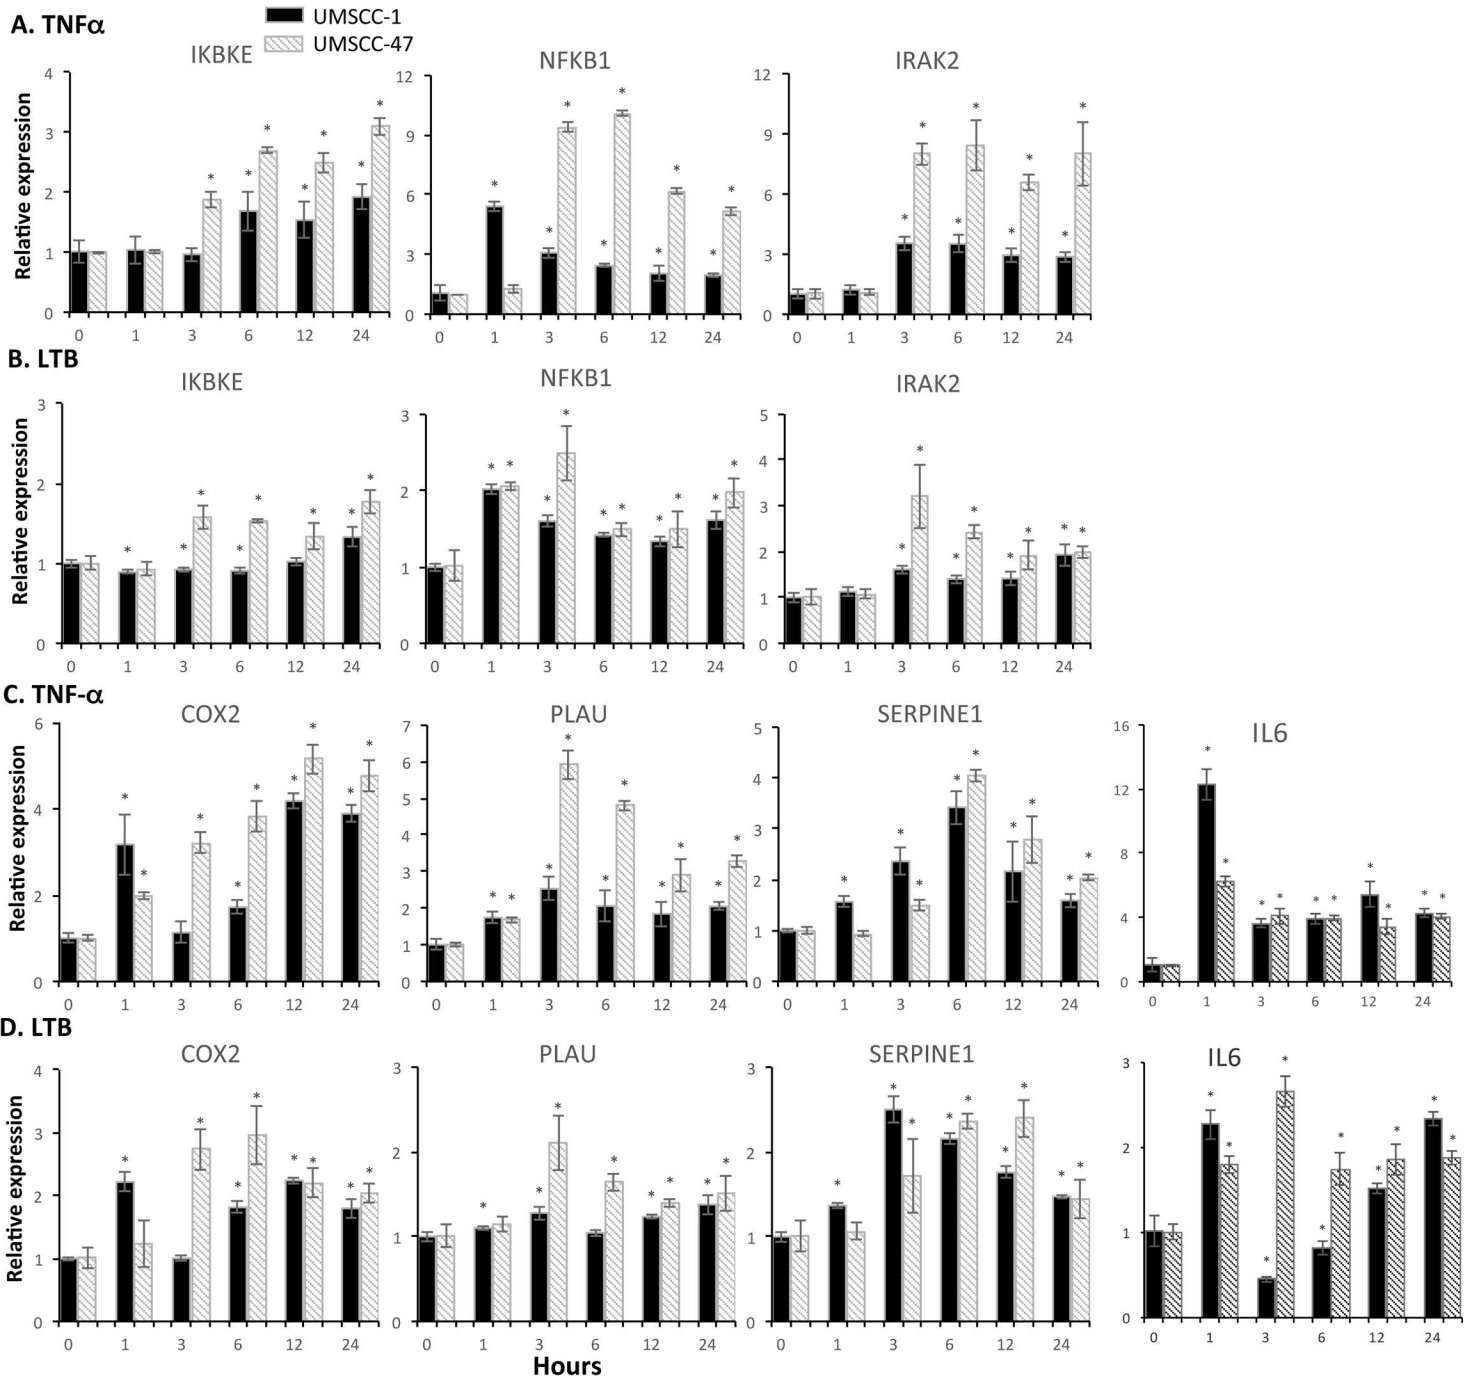

Suppl Fig 8



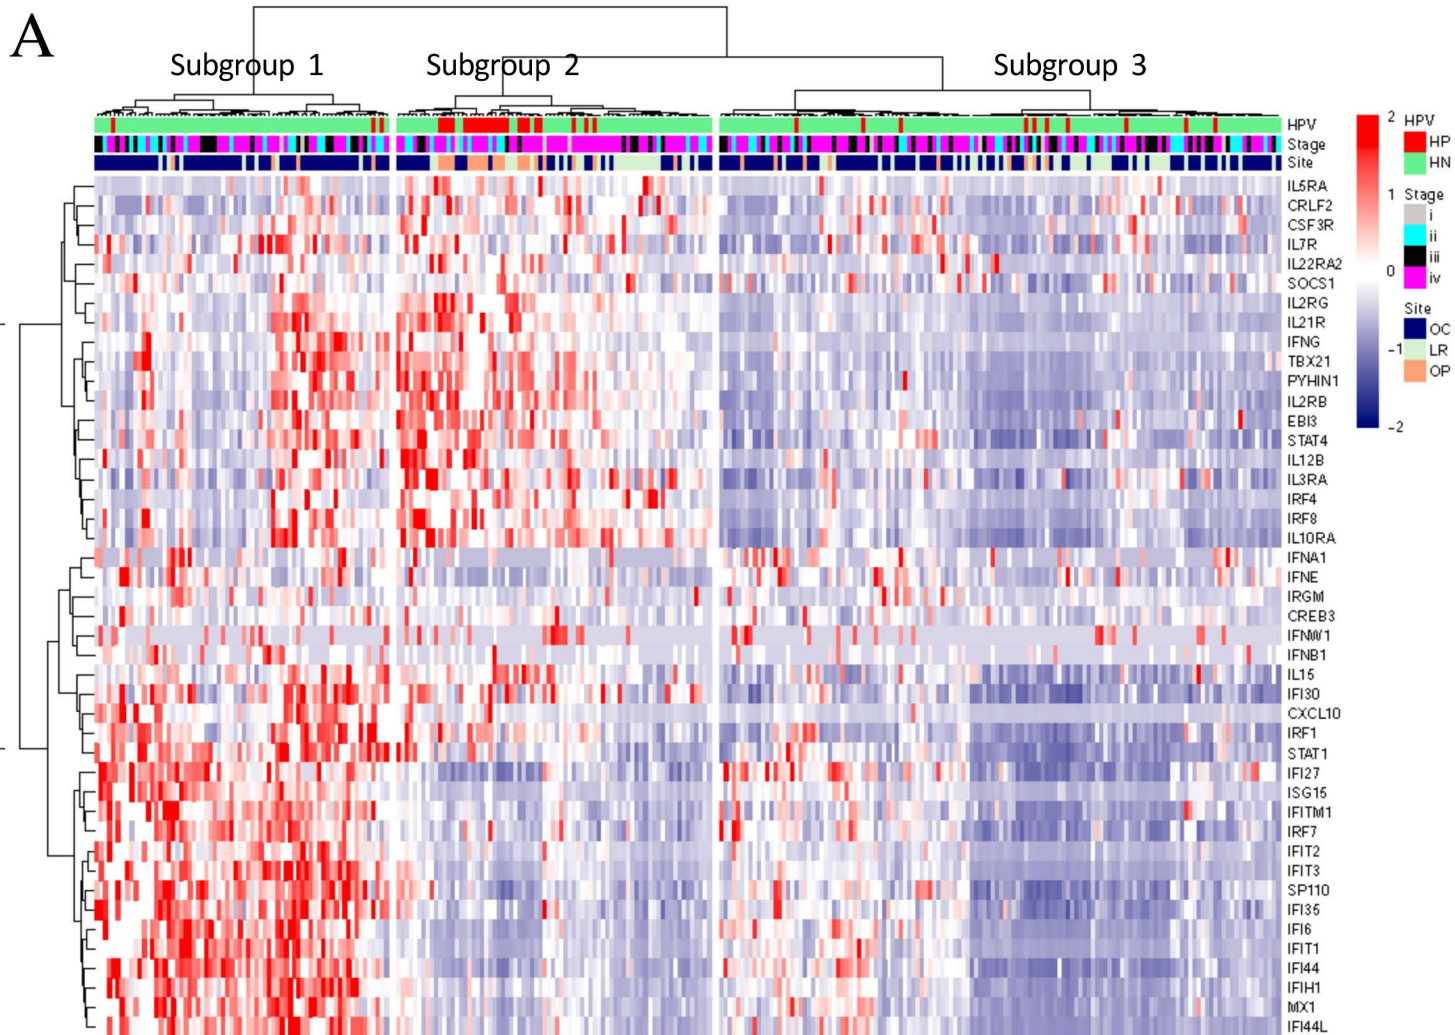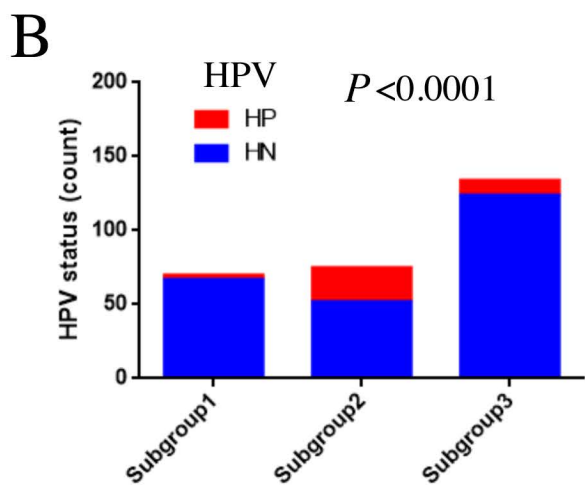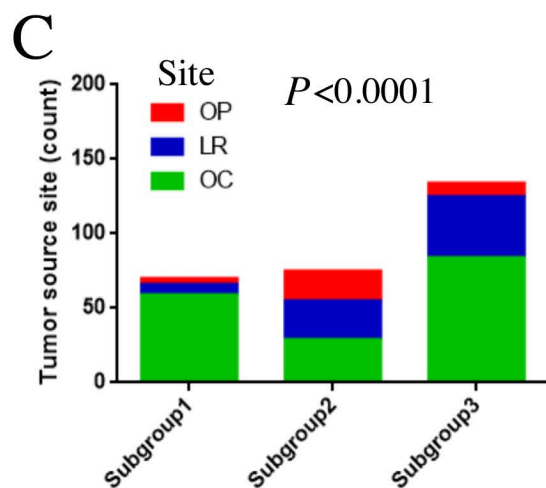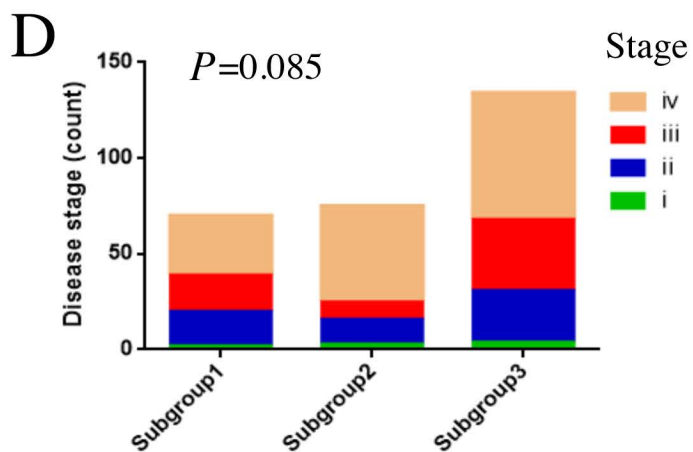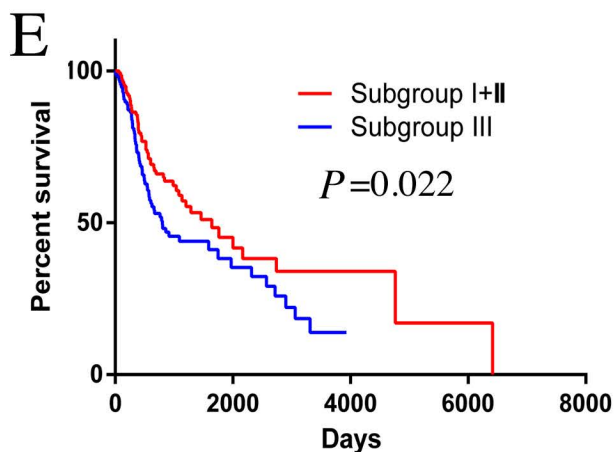

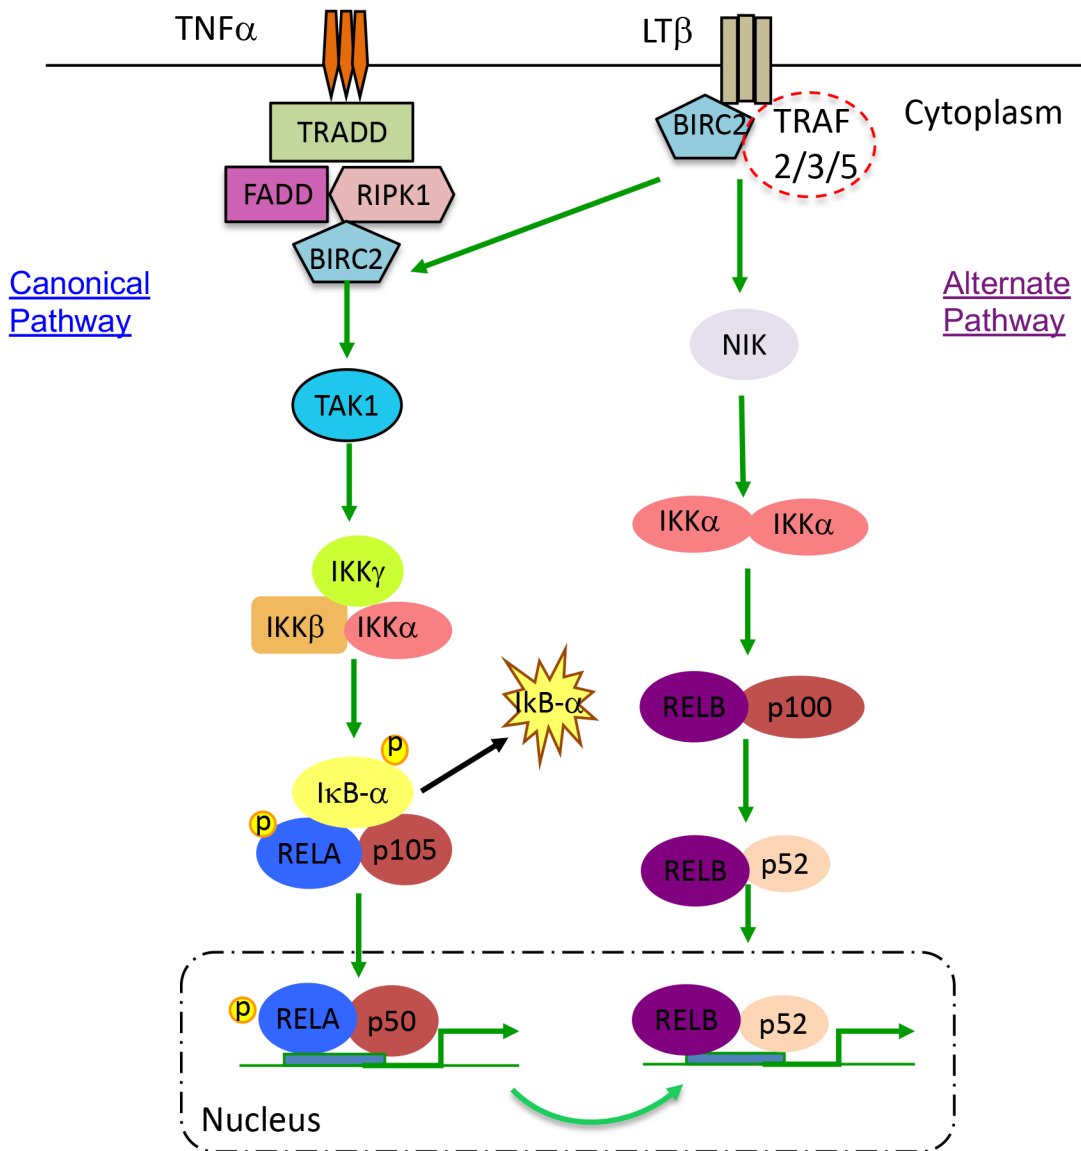

Suppl Figure 10
